# Supplementary material
Source: publisher site journal article supplement (https://www.spandidos-publications.com/7670/downloadSupplementary)
Supplement: Supplementary file 1 [file downloadSupplementary]

**Table S1.** Primers for RT-qPCR.

| <b>Transcript</b> | <b>Primer</b> | <b>Sequence, 5'-3'</b>    |
|-------------------|---------------|---------------------------|
| β-actin           | Forward       | TCACCCACACTGTGCCCATCTACGA |
|                   | Reverse       | CAGCGGAACCGCTCATTGCCAATGG |
| ANKRD1            | Forward       | CGGAGCATCTTATCGCCTGT      |
|                   | Reverse       | AGTCTCACCGCATCATGCAA      |
| E-cadherin        | Forward       | TGCACCAACCCTCATGAGTG      |
|                   | Reverse       | GTCAGTATCAGCCGCTTTCAG     |
| Endothelin-1      | Forward       | CAAACCAGGTCGGAGACCAT      |
|                   | Reverse       | GCTCGGTTGTGGGTACATA       |
| IL-6              | Forward       | CTTCGGTCCAGTTGCCTTCT      |
|                   | Reverse       | TGGAATCTTCTCCTGGGGGT      |
| MMP-9             | Forward       | GGTGATTGACGACGCCTTTG      |
|                   | reverse       | CTGTACACGCGAGTGAAGGT      |
| PLAU              | forward       | GATACGAACAGGCGAACTGTG     |
|                   | reverse       | TGCTGCCCTCCGAATTTCTT      |
| UBE2T             | forward       | GCGAGCTCGTAGAAATATTAGGTG  |
|                   | reverse       | GAGAAATCGGATCTGAGGAGGT    |
| Vimentin          | forward       | GCAAAGATTCCACTTTGCGT      |
|                   | reverse       | GAAATTGCAGGAGGAGATGC      |

ANKRD1, ankyrin repeat domain 1; IL-6, interleukin-6; MMP-9, matrix metalloproteinase-9; PLAU, plasminogen activator, urokinase; UBE2T, ubiquitin-conjugating enzyme E2 T.

**Table SII.** The genes with HR $\geq$ 1.5 in KM-plotter analysis, identified among top 500 genes with upregulated expression in head and neck cancer tissues listed in GEPIA database.

| Gene symbol | Gene name                                           | HR   | P-value               |
|-------------|-----------------------------------------------------|------|-----------------------|
| ADA         | Adenosine Deaminase                                 | 1.5  | 0.014                 |
| AGTRAP      | Angiotensin II Receptor Associated Protein          | 1.5  | 0.0083                |
| ANO1        | Anoctamin 1                                         | 1.73 | 7.30x10 <sup>-5</sup> |
| ARSI        | Arylsulfatase Family Member I                       | 1.5  | 0.0028                |
| B4GALNT1    | Beta-1,4-N-Acetyl-Galactosaminyltransferase 1       | 1.5  | 0.0027                |
| BASP1       | Brain Abundant Membrane Attached Signal Protein 1   | 1.59 | 0.00066               |
| C16orf74    | Chromosome 16 Open Reading Frame 74                 | 1.78 | 0.00014               |
| CXCL8       | C-X-C Motif Chemokine Ligand 8                      | 1.52 | 0.0048                |
| DCBLD1      | Discoidin, CUB And LCCL Domain Containing 1         | 1.51 | 0.0023                |
| DKK1        | Dickkopf WNT Signaling Pathway Inhibitor 1          | 2.12 | 4.40x10 <sup>-8</sup> |
| DUSP9       | Dual Specificity Phosphatase 9                      | 1.64 | 0.0038                |
| ECT2        | Epithelial Cell Transforming 2                      | 1.56 | 0.01                  |
| FADS3       | Fatty Acid Desaturase 3                             | 1.76 | 7.70x10 <sup>-5</sup> |
| FAP         | Fibroblast Activation Protein Alpha                 | 1.59 | 0.00066               |
| FN1         | Fibronectin 1                                       | 1.5  | 0.0035                |
| FOXD1       | Forkhead Box D1                                     | 1.58 | 0.00073               |
| FSCN1       | Fascin Actin-Bundling Protein 1                     | 1.81 | 0.00058               |
| FST         | Follistatin                                         | 1.65 | 0.0017                |
| FSTL3       | Follistatin Like 3                                  | 1.72 | 0.0015                |
| GNA12       | G Protein Subunit Alpha 12                          | 1.57 | 0.0013                |
| HIST2H2AA4  | H2A Clustered Histone 19                            | 1.55 | 0.0027                |
| HMGA2       | High Mobility Group AT-Hook 2                       | 1.66 | 0.00057               |
| IGF2BP2     | Insulin Like Growth Factor 2 mRNA Binding Protein 2 | 2.01 | 5.10x10 <sup>-5</sup> |
| INHBA       | Inhibin Subunit Beta A                              | 1.66 | 0.00065               |
| ITGA3       | Integrin Subunit Alpha 3                            | 1.73 | 0.00014               |
| ITGA5       | Integrin Subunit Alpha 5                            | 1.63 | 0.00029               |
| ITGA6       | Integrin Subunit Alpha 6                            | 1.7  | 1.00x10 <sup>-4</sup> |
| ITM2C       | Integral Membrane Protein 2C                        | 12.8 | 0.074                 |
| KLF7        | KLF Transcription Factor 7                          | 1.51 | 0.0028                |
| LGALS1      | Galectin 1                                          | 1.51 | 0.0027                |
| LINC00958   | Long Intergenic Non-Protein Coding RNA 958          | 1.56 | 0.001                 |

|           |                                                    |      |                       |
|-----------|----------------------------------------------------|------|-----------------------|
| LYPD1     | LY6/PLAUR Domain Containing 1                      | 1.51 | 0.016                 |
| MAGED4    | MAGE Family Member D4                              | 1.54 | 0.0024                |
| MET       | MET Proto-Oncogene, Receptor Tyrosine Kinase       | 1.58 | 0.0019                |
| MFAP2     | Microfibril Associated Protein 2                   | 1.55 | 0.0015                |
| MMP13     | Matrix Metalloproteinase 13                        | 1.51 | 0.0081                |
| MMP14     | Matrix Metalloproteinase 14                        | 1.52 | 0.011                 |
| MYO1B     | Myosin IB                                          | 1.66 | 0.0038                |
| NRG1      | Neuregulin 1                                       | 2.39 | 0.057                 |
| NT5E      | 5'-Nucleotidase Ecto                               | 1.54 | 0.0014                |
| P4HA1     | Prolyl 4-Hydroxylase Subunit Alpha 1               | 1.83 | 1.40x10 <sup>-5</sup> |
| P4HA2     | Prolyl 4-Hydroxylase Subunit Alpha 2               | 1.62 | 0.0062                |
| PLAU      | Plasminogen Activator, Urokinase                   | 1.72 | 0.00027               |
| PLOD2     | Procollagen-Lysine, 2-Oxoglutarate 5-Dioxygenase 2 | 1.72 | 0.0023                |
| PMEPA1    | Prostate Transmembrane Protein, Androgen Induced 1 | 1.61 | 0.0028                |
| PXN       | Paxillin                                           | 1.67 | 0.00036               |
| RAB32     | RAB32, Member RAS Oncogene Family                  | 1.58 | 0.0026                |
| RFC4      | Replication Factor C Subunit 4                     | 1.52 | 0.012                 |
| SCG5      | Secretogranin V                                    | 1.55 | 0.0011                |
| SERPINE1  | Serpin Family E Member 1                           | 1.93 | 3.70x10 <sup>-5</sup> |
| SERPINH1  | Serpin Family H Member 1                           | 1.66 | 0.00019               |
| SFXN3     | Sideroflexin 3                                     | 1.65 | 0.00038               |
| STC2      | Stanniocalcin 2                                    | 1.82 | 1.50x10 <sup>-5</sup> |
| TENM2     | Teneurin Transmembrane Protein 2                   | 1.54 | 0.0049                |
| TGFBI     | Transforming Growth Factor Beta 1                  | 1.86 | 0.00034               |
| TINAGL1   | Tubulointerstitial Nephritis Antigen Like 1        | 1.54 | 0.002                 |
| TMEM92    | Transmembrane Protein 92                           | 1.58 | 0.00086               |
| TNFAIP6   | TNF Alpha Induced Protein 6                        | 1.5  | 0.0033                |
| TNFRSF12A | TNF Receptor Superfamily Member 12A                | 1.52 | 0.0023                |
| TNFRSF6B  | TNF Receptor Superfamily Member 6b                 | 1.52 | 0.0026                |
| TPST1     | Tyrosylprotein Sulfotransferase 1                  | 1.5  | 0.0028                |
| UBE2T     | Ubiquitin-Conjugating Enzyme E2 T                  | 1.5  | 0.0061                |
| WDR66     | Cilia And Flagella Associated Protein 251          | 1.53 | 0.011                 |
| WNT7A     | Wnt Family Member 7A                               | 1.56 | 0.0012                |

GEPIA, gene expression profiling interactive analysis; KM-plotter, Kaplan-Meier plotter; HR, hazard ratio.

**Table SIII.** Stage plot results of top 10 genes showing the strongest correlation with head and neck cancer stage progression.

| <b>Gene symbol</b> | <b>Gene name</b>                                  | <b>Stage F-value</b> | <b>P-value</b> |
|--------------------|---------------------------------------------------|----------------------|----------------|
| UBE2T              | Ubiquitin-conjugating enzyme 2T E                 | 5.02                 | 0.00193        |
| C16orf74           | Chromosome 16 Open Reading Frame 74               | 3.78                 | 0.0105         |
| PLOD2              | Procollagen-Lysine,2-Oxoglutarate 5-Dioxygenase 2 | 3.64                 | 0.0128         |
| P4HA1              | Prolyl 4-Hydroxylase Subunit Alpha-1              | 3.63                 | 0.0129         |
| STC2               | Stanniocalcin 2                                   | 3.57                 | 0.0139         |
| FN1                | Fibronectin 1                                     | 2.82                 | 0.0384         |
| RFC4               | Replication Factor C Subunit 4                    | 2.51                 | 0.0583         |
| MAGED4             | Melanoma-Associated Antigen D4                    | 2.12                 | 0.0965         |
| DCBLD1             | Discoidin, CUB and LCCL Domain-containing 1       | 2.06                 | 0.105          |
| SCG5               | Secretogranin V                                   | 2.01                 | 0.111          |

**Table SIV.** GSEA results of UBE2T SAS cells vs. Control SAS cells.

| <b>Gene sets</b>                           | <b>NES</b> | <b>Nominal P-value</b> |
|--------------------------------------------|------------|------------------------|
| HALLMARK_EPITHELIAL_MESENCHYMAL_TRANSITION | 2.06       | <0.0001                |
| HALLMARK_MYC_TARGETS_V1                    | 1.97       | <0.0001                |
| HALLMARK_OXIDATIVE_PHOSPHORYLATION         | 1.84       | <0.0001                |
| HALLMARK_KRAS_SIGNALING_UP                 | 1.81       | <0.0001                |
| HALLMARK_FATTY_ACID_METABOLISM             | 1.72       | <0.0001                |
| HALLMARK_IL6_JAK_STAT3_SIGNALING           | 1.70       | 0.0046                 |
| HALLMARK_INTERFERON_GAMMA_RESPONSE         | 1.69       | <0.0001                |
| HALLMARK_TNFA_SIGNALING_VIA_NFKB           | 1.65       | <0.0001                |
| HALLMARK_UV_RESPONSE_UP                    | 1.62       | 0.001                  |
| HALLMARK_MTORC1_SIGNALING                  | 1.58       | <0.0001                |

GSEA, gene set enrichment analysis; IL6, interleukin-6; JAK, Janus protein tyrosine kinase; MTORC1, mammalian target of rapamycin complex 1; NES, normalized enrichment score; NFKB, nuclear factor- $\kappa$ B; STAT3, signal transducer and activator of transcription 3; TNFA, tumor necrosis factor- $\alpha$ ; UBE2T, ubiquitin-conjugating enzyme E2 T.

**Table SV.** List of 62 DEGs upregulated more than 3.0-fold in UBE2T SAS cells vs. Control SAS cells.

|                        |                    | <b>Expression level log<sub>2</sub>(TPM+1)</b> |             |                |                |
|------------------------|--------------------|------------------------------------------------|-------------|----------------|----------------|
| <b>Gene Identifier</b> | <b>Ensemble ID</b> | <b>NC_1</b>                                    | <b>NC_2</b> | <b>UBE2T_1</b> | <b>UBE2T_2</b> |
| ALOX5AP                | ENSG00000132965    | 0.7178699                                      | 0.9993426   | 2.7623286      | 2.6654954      |
| ANKRD1                 | ENSG00000148677    | 4.695823                                       | 5.33594     | 6.7235913      | 6.697821       |
| ANO2                   | ENSG00000047617    | 2.7596478                                      | 3.3816879   | 5.382657       | 5.3583055      |
| BACE2                  | ENSG00000182240    | 0.7073071                                      | 0.9158071   | 2.558877       | 2.644311       |
| CAPSL                  | ENSG00000152611    | 0.3884942                                      | 0.8216217   | 2.4955034      | 2.7364442      |
| CDH11                  | ENSG00000140937    | 0.3334015                                      | 0.4879215   | 2.8864522      | 2.9246304      |
| CHN1                   | ENSG00000128656    | 1.9297448                                      | 2.460602    | 3.959442       | 3.9606454      |
| CSF2                   | ENSG00000164400    | 2.3081574                                      | 3.0571268   | 5.343888       | 5.346417       |
| CXCL1                  | ENSG00000163739    | 1.2050318                                      | 1.5381256   | 4.3657136      | 4.3920074      |
| DAW1                   | ENSG00000123977    | 3.7121882                                      | 4.579878    | 5.951195       | 5.9312344      |
| ECSCR                  | ENSG00000249751    | 2.1829805                                      | 2.8634233   | 4.534851       | 4.5626116      |
| EDIL3                  | ENSG00000164176    | 1.3319232                                      | 1.8040282   | 3.1102366      | 3.2384324      |
| EDN1                   | ENSG00000078401    | 1.363468                                       | 1.5760233   | 3.3225675      | 3.1704574      |
| GJA1                   | ENSG00000152661    | 0.6005657                                      | 0.8955959   | 5.082703       | 5.158631       |
| GSG1                   | ENSG00000111305    | 0.9041107                                      | 1.4594278   | 2.955711       | 2.9257584      |
| HHAT                   | ENSG00000054392    | 1.4710141                                      | 1.8755703   | 4.268314       | 4.33598        |
| HSD11B1                | ENSG00000117594    | 4.2269077                                      | 5.0969095   | 7.3550453      | 7.327537       |
| IGFL1                  | ENSG00000188293    | 2.9462502                                      | 3.3641484   | 5.482359       | 5.3482456      |
| IL32                   | ENSG00000008517    | 2.8526955                                      | 3.388186    | 4.9799056      | 4.9011755      |
| IL6                    | ENSG00000136244    | 0.7130638                                      | 1.1922693   | 3.094498       | 3.0411346      |
| KRT81                  | ENSG00000205426    | 5.935103                                       | 6.830429    | 8.479475       | 8.507409       |
| KRT86                  | ENSG00000170442    | 2.384861                                       | 3.118648    | 4.568863       | 4.604279       |
| KRTAP2-3               | ENSG00000212724    | 5.249469                                       | 5.7748847   | 7.1854763      | 7.312811       |
| LINC00601              | ENSG00000235180    | 1.7514783                                      | 2.8383687   | 4.0925775      | 3.8191571      |
| LOX                    | ENSG00000113083    | 2.8349707                                      | 3.6084135   | 4.878864       | 4.9239645      |
| LYPD1                  | ENSG00000150551    | 2.7977455                                      | 4.0189567   | 5.56027        | 5.7980657      |
| MAOA                   | ENSG00000189221    | 2.8558064                                      | 3.6994224   | 6.025945       | 5.9751167      |
| MMP9                   | ENSG00000100985    | 0.7711058                                      | 1.2144533   | 3.1434715      | 3.265          |
| NEFL                   | ENSG00000277586    | 1.6817783                                      | 2.3697867   | 4.0942397      | 4.005871       |

|             |                 |           |           |           |           |
|-------------|-----------------|-----------|-----------|-----------|-----------|
| NGF         | ENSG00000134259 | 1.4406396 | 2.1250641 | 3.6721816 | 3.7435563 |
| NNMT        | ENSG00000166741 | 3.4475274 | 4.213741  | 6.6662846 | 6.650917  |
| NTF3        | ENSG00000185652 | 1.2921809 | 1.695057  | 3.7027931 | 3.6075027 |
| PLAU        | ENSG00000122861 | 6.853114  | 7.5155826 | 9.164218  | 9.1817    |
| PRSS23      | ENSG00000150687 | 4.4808393 | 5.319453  | 6.473401  | 6.5180707 |
| PTPRR       | ENSG00000153233 | 1.1634018 | 1.5176588 | 3.0029163 | 2.9704752 |
| PTX3        | ENSG00000163661 | 1.5795472 | 2.3706164 | 5.263225  | 5.3044662 |
| QPCT        | ENSG00000115828 | 2.923895  | 3.7738793 | 4.911306  | 5.0358806 |
| RARRES3     | ENSG00000133321 | 1.8435555 | 1.4202232 | 3.3704634 | 3.228167  |
| RGS4        | ENSG00000117152 | 1.2157208 | 1.5903273 | 3.5590212 | 3.5230124 |
| S100A3      | ENSG00000188015 | 2.2041125 | 2.7765667 | 4.574708  | 4.4639    |
| SAA1        | ENSG00000173432 | 0.720086  | 1.1282854 | 4.407286  | 4.446394  |
| SCG2        | ENSG00000171951 | 0.8269953 | 1.2149825 | 3.5498767 | 3.5661268 |
| SCG5        | ENSG00000166922 | 0.6802306 | 1.1752195 | 2.9864101 | 3.0804868 |
| SEC22B      | ENSG00000265808 | 6.4196014 | 7.2603292 | 8.411599  | 8.459354  |
| SERPINB2    | ENSG00000197632 | 7.373833  | 8.321218  | 9.497752  | 9.539339  |
| SERPINE2    | ENSG00000135919 | 1.7414718 | 2.3499656 | 3.7190247 | 3.7754853 |
| SERTAD4     | ENSG00000082497 | 3.0555203 | 3.6977043 | 4.9646945 | 5.0458717 |
| SERTAD4-AS1 | ENSG00000203706 | 1.104868  | 1.6639359 | 3.1350276 | 3.2596169 |
| SH2D1B      | ENSG00000198574 | 1.3076029 | 1.7929637 | 3.2658334 | 3.3892648 |
| SRGN        | ENSG00000122862 | 2.033796  | 2.9656997 | 5.77917   | 5.7931857 |
| STK32B      | ENSG00000152953 | 1.0681258 | 1.5671375 | 3.0879133 | 2.9408674 |
| SYT14       | ENSG00000143469 | 1.187333  | 1.6410606 | 3.005452  | 3.1466615 |
| TDO2        | ENSG00000151790 | 0.0824191 | 0.0392464 | 2.3245203 | 2.207478  |
| TM4SF1      | ENSG00000169908 | 4.2345967 | 4.871212  | 6.216637  | 6.166579  |
| TMEM200A    | ENSG00000164484 | 4.2664967 | 5.027463  | 6.433199  | 6.456367  |
| TNFSF18     | ENSG00000120337 | 1.165601  | 1.7283058 | 3.1350276 | 3.1957028 |
| TPM1        | ENSG00000140416 | 4.023439  | 4.7425375 | 5.9895105 | 6.0408244 |
| TSPAN2      | ENSG00000134198 | 1.8822137 | 2.4930134 | 3.83003   | 3.9069123 |
| UBE2T       | ENSG00000077152 | 6.399833  | 7.350524  | 13.342574 | 13.258359 |
| UPK1B       | ENSG00000114638 | 0.7193666 | 0.935751  | 2.889159  | 3.0566688 |
| VIM         | ENSG00000026025 | 5.299855  | 6.2110023 | 8.863347  | 8.852269  |
| WNT5B       | ENSG00000111186 | 2.4544556 | 3.0220776 | 4.5034623 | 4.5387707 |

DEGs, differentially expressed genes; ALOX5AP, arachidonate 5-lipoxygenase activating protein; ANKRD1, ankyrin repeat domain 1; ANO2, anoctamin 2; BACE2,  $\beta$ -site APP-cleaving enzyme 2; CAPSL, calcyphosine-like; CDH11,

cadherin-11; CHN1, chimerin 1; CSF2, colony-stimulating factor 2; CXCL1, C-X-C motif chemokine ligand 1; DAW1, dynein assembly factor with WD repeats 1; ECSCR, endothelial cell-specific chemotaxis receptor; EDIL3, EGF-like repeat and discoidin I-like domain-containing protein 3; EDN1, endothelin 1; GJA1, gap junction protein alpha-1; GSG1, germ cell-specific gene 1; HHAT, Hedgehog acyltransferase; HSD11B1, hydroxysteroid 11- $\beta$ dehydrogenase 1; IGFL1, insulin growth factor-like family member 1; IL, interleukin; KRT, keratin; KRTAP2-3, keratin-associated protein 2-3; LINC00601, long intergenic non-protein coding RNA 601; LOX, lysyl oxidase; LYPD1, Ly6/PLAUR domain-containing protein 1; MAOA, monoamine oxidase A; MMP9, matrix metalloproteinase-9; NEFL, neurofilament light chain; NGF, nerve growth factor; NNMT, nicotinamide N-methyltransferase; NTF3, neurotrophin 3; PLAU, plasminogen activator, urokinase; PRSS23, serine protease 23; PTPRR, protein tyrosine phosphatase receptor type R; PTX3, pentraxin 3; QPCT, glutaminyl-peptide cyclotransferase; RARRES3, retinoic acid receptor responder 3; RGS4, regulator of G protein signaling 4; S100A3, S100 calcium-binding protein A3; SAA1, serum amyloid A1; SCG, secretogranin; SEC22B, SEC22 homolog B, vesicle trafficking protein; SERPINB2, serpin family B member 2; SERPINE2, serpin family E member 2; SERTAD4, SERTA domain-containing protein 4; SERTAD4-AS1, SERTAD4 antisense RNA 1; SH2D1B, SH2 domain-containing protein 1B; SRGN, serglycin; STK32B, serine/threonine kinase 32B; SYT14, synaptotagmin-14; TDO2, tryptophan 2,3-dioxygenase; TM4SF1, transmembrane 4 L six family member 1; TMEM200A, transmembrane protein 200A; TNFSF18, tumor necrosis factor (ligand) superfamily, member 18; TPM1, tropomyosin 1; TSPAN2, tetraspanin 2; UBE2T, ubiquitin-conjugating enzyme E2 T; UPK1B, uroplakin 1B; VIM, vimentin; WNT5B, Wnt family member 5B.
